# Supplementary material for: Accurate fabrication and orientation of electron acceptor and donor active sites for enhancing photocatalytic overall water splitting
Source: Royal Society of Chemistry journal article supplement (doi:10.1039/d4ta02502d), 2024-01-01
Supplement: d4ta02502d1.pdf [file d4ta02502d1.pdf]

## Supporting Information

# **Accurate Fabrication and Orientation of Electron Acceptor and Donor Active Sites for Enhancing Photocatalytic Overall Water Splitting**

Yan Wu,<sup>a†</sup> Qingqing Chen,<sup>a†</sup> Jiaping Liu,<sup>a</sup> Kai Fang,<sup>a</sup> Man Zhang,<sup>b</sup> Tao Jing<sup>c,\*</sup>, Zhujie Li,<sup>b\*</sup> and Gang Wang<sup>a\*</sup>

<sup>a</sup>Key Laboratory of Functional Molecular Solids, Ministry of Education, College of Chemistry and Materials Science, Anhui Normal University, Wuhu, 241002, P. R. China.  
E-mail: GangWang@ahnu.edu.cn

<sup>b</sup>Advanced Technology Research Institute, Beijing Institute of Technology, Jinan, 250300, P. R. China. E-mail: zhujieli89@163.com

<sup>c</sup>College of Science, Kaili University, Kaili, 556011, P. R. China.

<sup>†</sup>The authors contributed equally to this work.

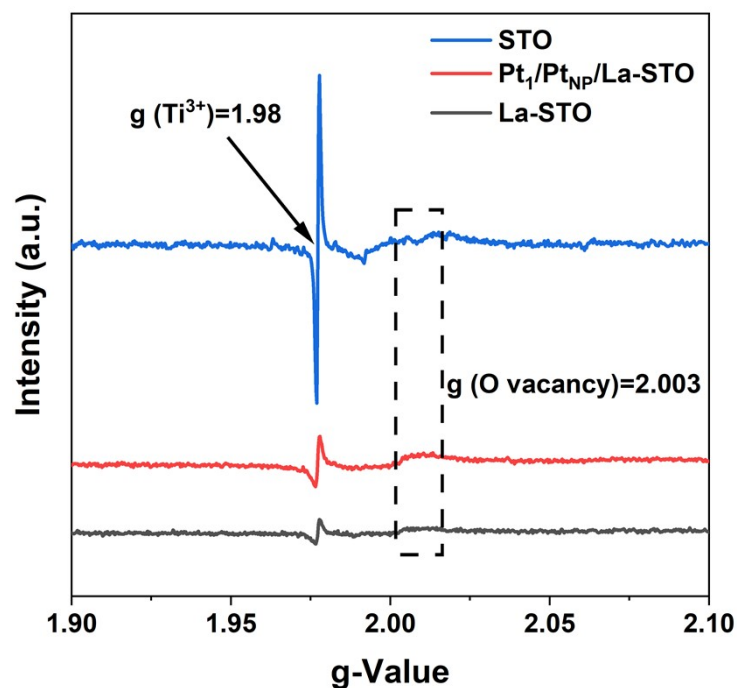

**Fig. S1.** EPR results of STO, La-STO and Pt<sub>1</sub>/Pt<sub>NP</sub>/La-STO. A large number of Ti<sup>3+</sup> defect existed in the pure STO. After La doped, the La<sup>3+</sup> ions were conducive to decrease the Ti<sup>3+</sup> defect content, which was beneficial for improving the quality of STO crystal.

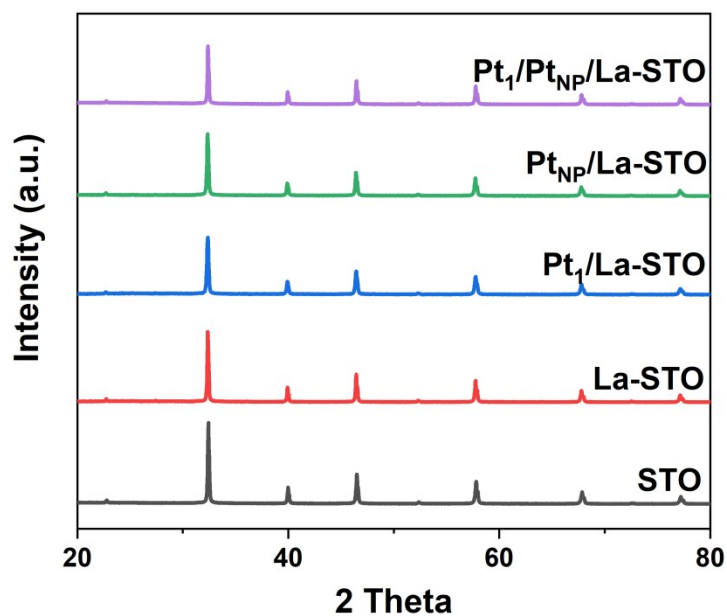

**Fig. S2.** X-ray diffraction patterns of STO, La-STO, Pt<sub>1</sub>/La-STO, Pt<sub>NP</sub>/La-STO and Pt<sub>1</sub>/Pt<sub>NP</sub>/La-STO.

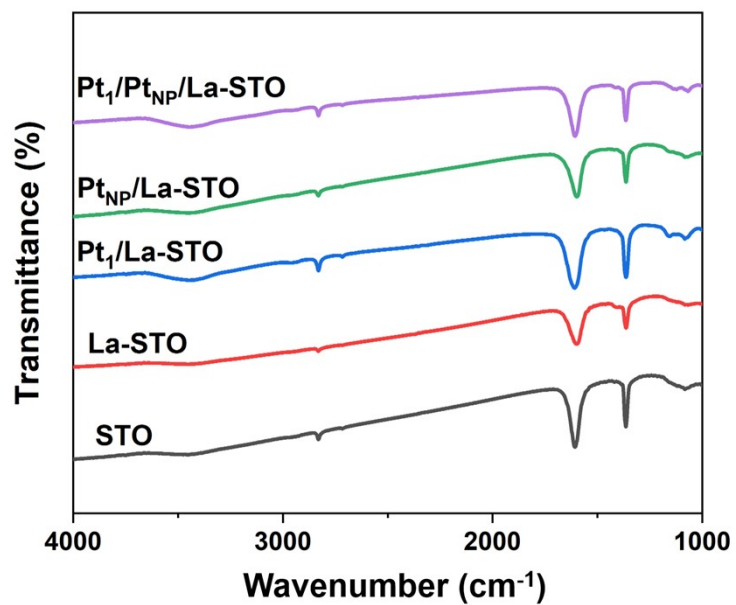

**Fig. S3.** Fourier transforms infrared spectroscopy (FT-IR) spectra in the zone of 4000-1000 cm<sup>-1</sup>.

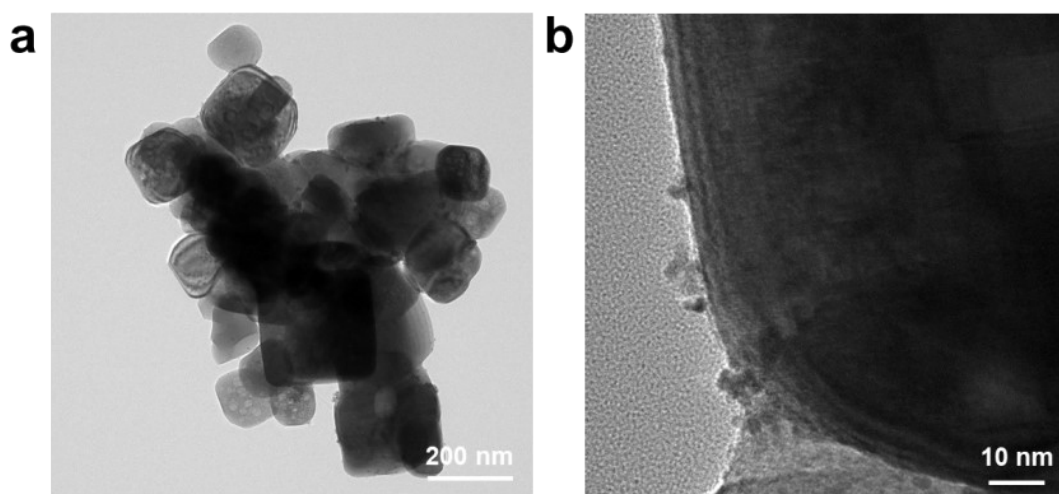

**Fig. S4.** Transmission electron microscopy (TEM) images of Pt<sub>1</sub>/Pt<sub>NP</sub>/La-STO.

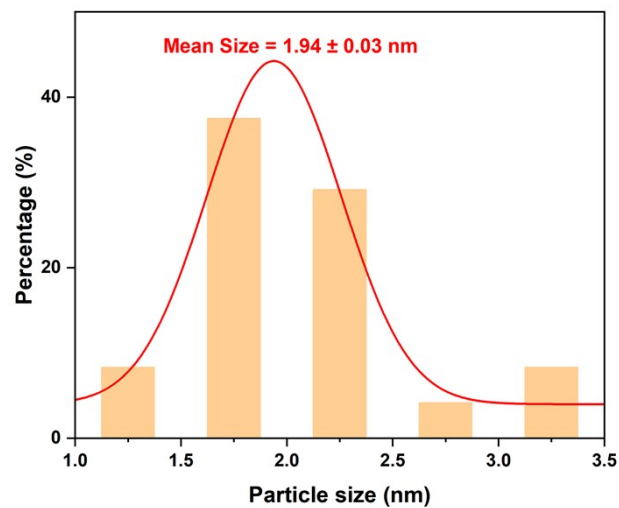

**Fig. S5.** The size distribution histograms of Pt<sub>NP</sub> (scale bar: 50 nm).

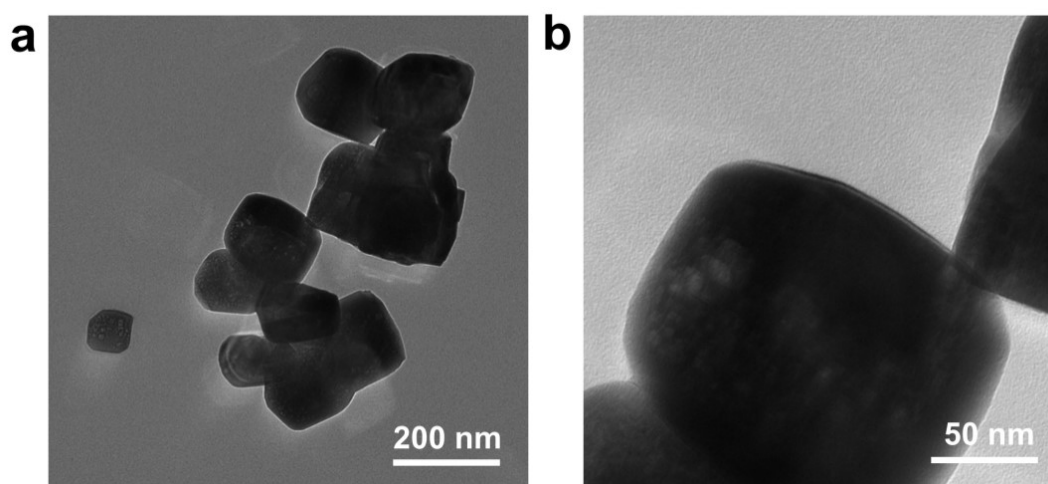

**Fig. S6.** TEM images of STO.

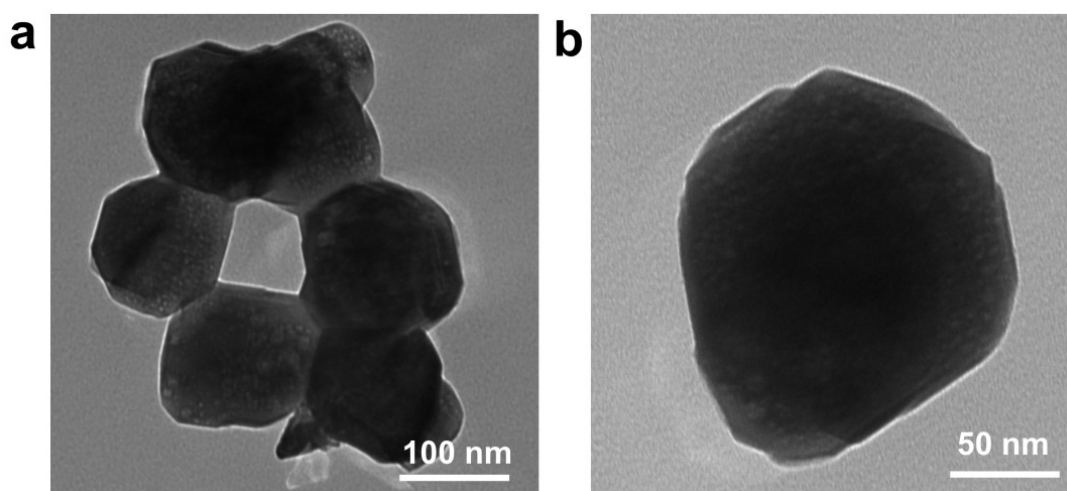

**Fig. S7.** TEM images of La-STO.

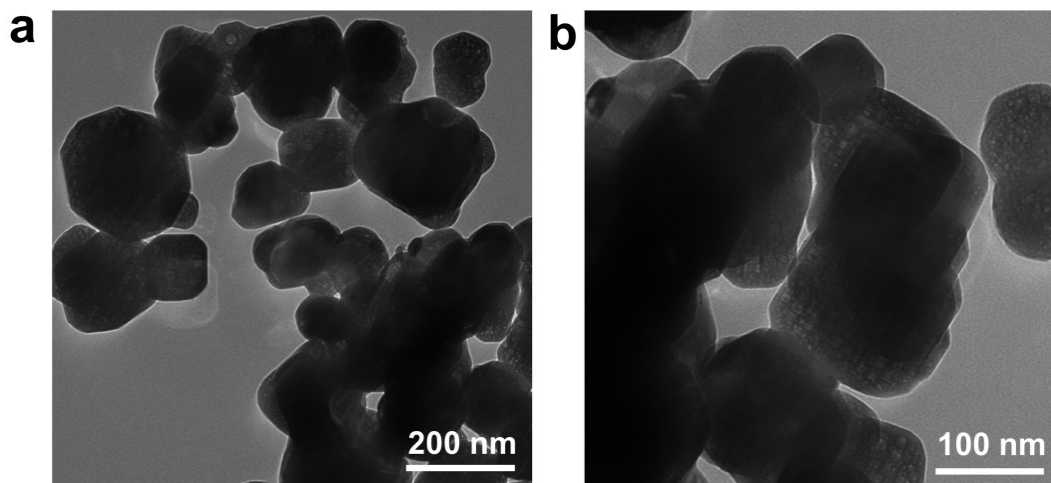

**Fig. S8.** TEM images of Pt<sub>1</sub>/La-STO.

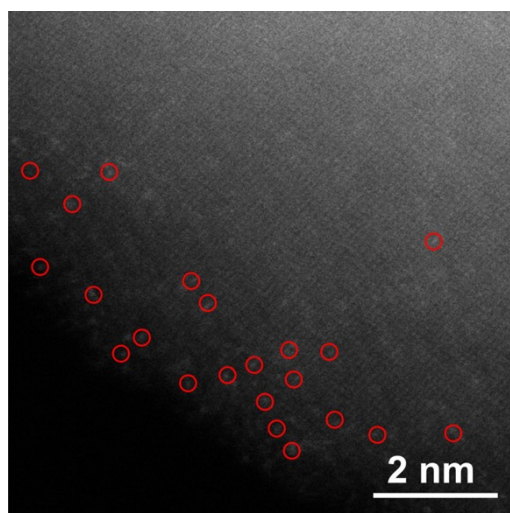

**Fig. S9.** HAADF-STEM image of Pt<sub>1</sub>/La-STO.

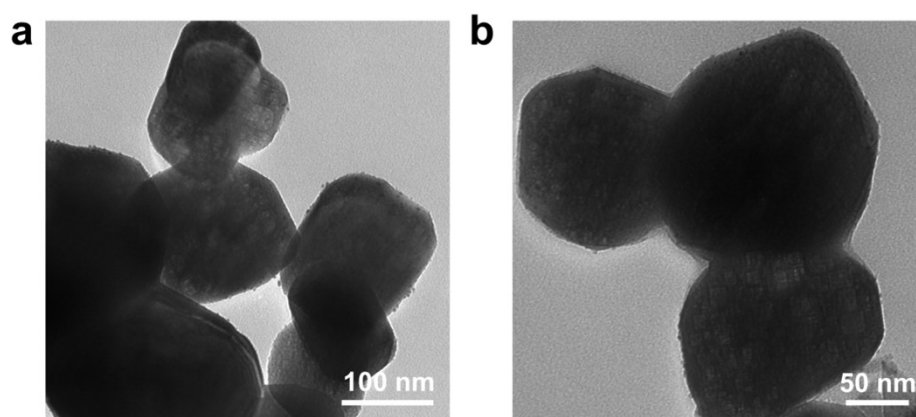

**Fig. S10.** TEM images of Pt<sub>NP</sub>/La-STO.

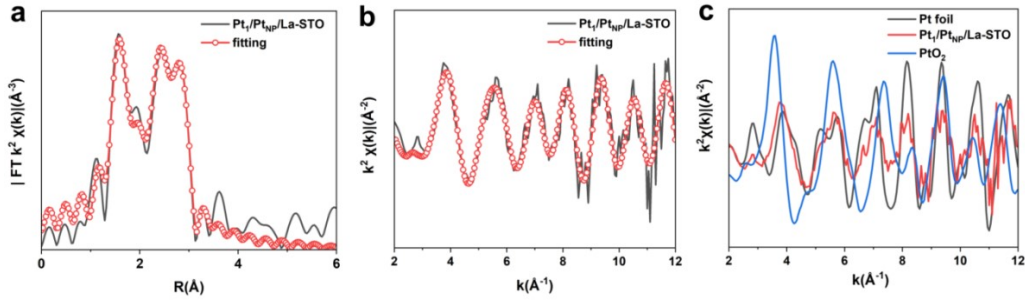

**Fig. S11.** EXAFS (a) R space and (b) k-space fitting curves of Pt<sub>1</sub>/Pt<sub>NP</sub>/La-STO. FT-EXAFS spectra at (c) k-space of Pt<sub>1</sub>/Pt<sub>NP</sub>/La-STO, Pt foil and PtO<sub>2</sub>.

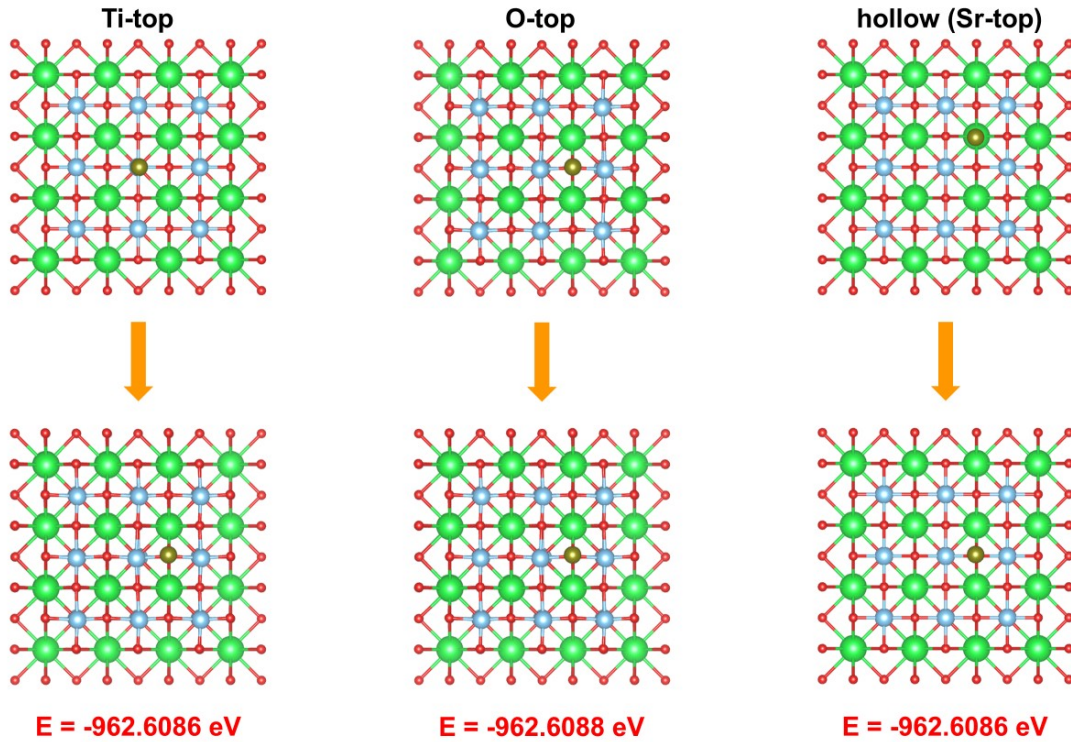

**Fig. S12.** The upper and lower panels show the three different initial configurations of Pt single atom on La-STO and their corresponding optimized structures, respectively. As shown in the lower panels, all the three configurations become the O-top structure, which confirms the most stable position for single atom Pt. The green, blue, red and brown balls are represented as Sr, Ti, O and Pt atoms, respectively.

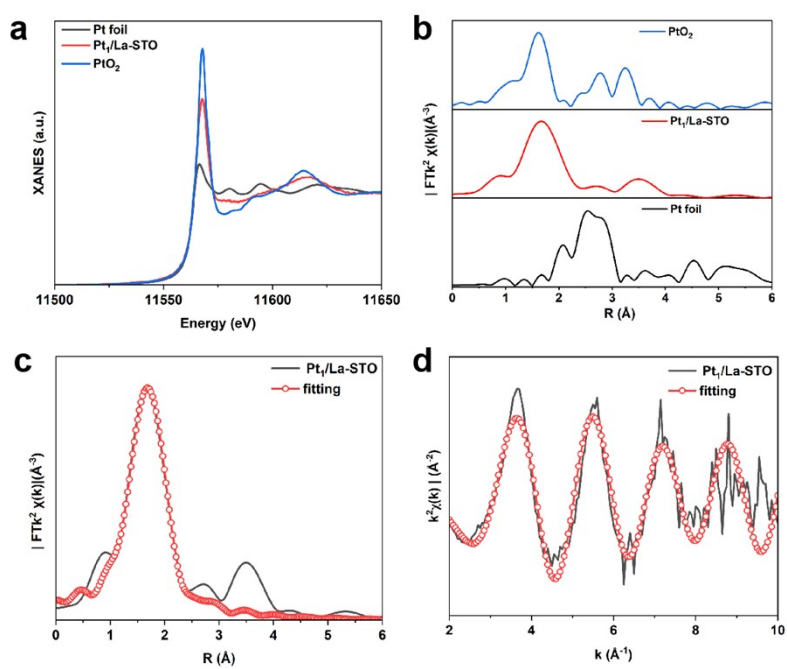

**Fig. S13.** (a) Pt L<sub>3</sub>-edge XANES spectra of Pt<sub>1</sub>/La-STO, Pt foil and PtO<sub>2</sub>. (b) FT-EXAFS spectra at R space of Pt<sub>1</sub>/La-STO. (c) R-space fitting results of Pt<sub>1</sub>/La-STO. (d) k-space fitting results of Pt<sub>1</sub>/La-STO.

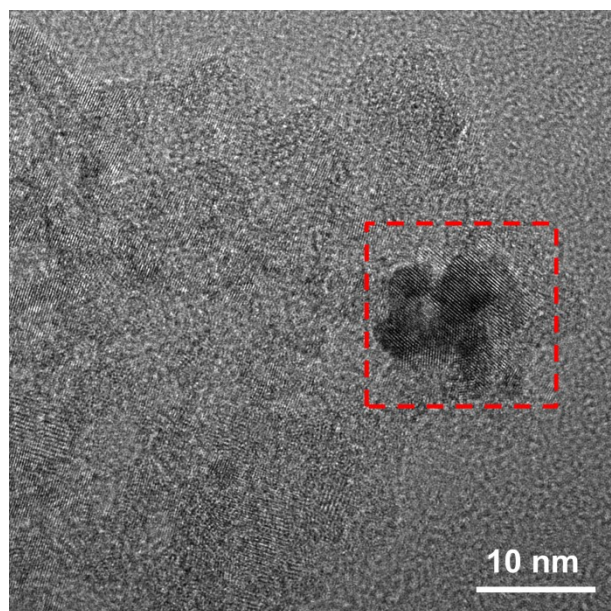

**Fig. S14.** HRTEM image of Pt<sub>1</sub>/Pt<sub>NP</sub>/TiO<sub>2</sub> (red box is Pt<sub>NP</sub>).

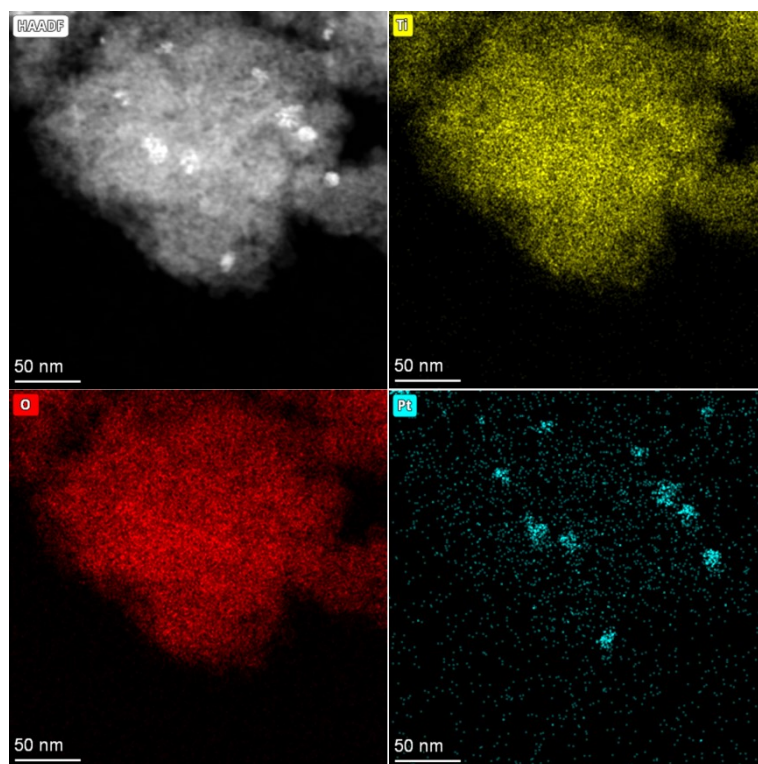

**Fig. S15.** EDS mapping images of  $\text{Pt}_1/\text{Pt}_{\text{NP}}/\text{TiO}_2$ .

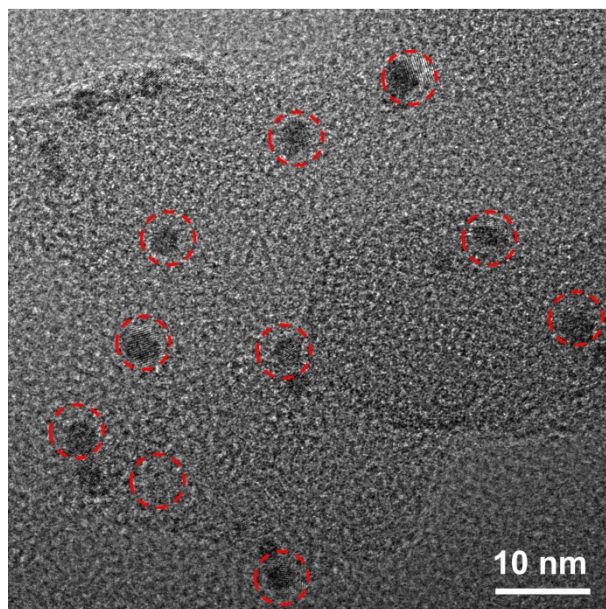

**Fig. S16.** HRTEM image of  $\text{Pt}_1/\text{Pt}_{\text{NP}}/\text{g-C}_3\text{N}_4$  (red box is  $\text{Pt}_{\text{NP}}$ ).



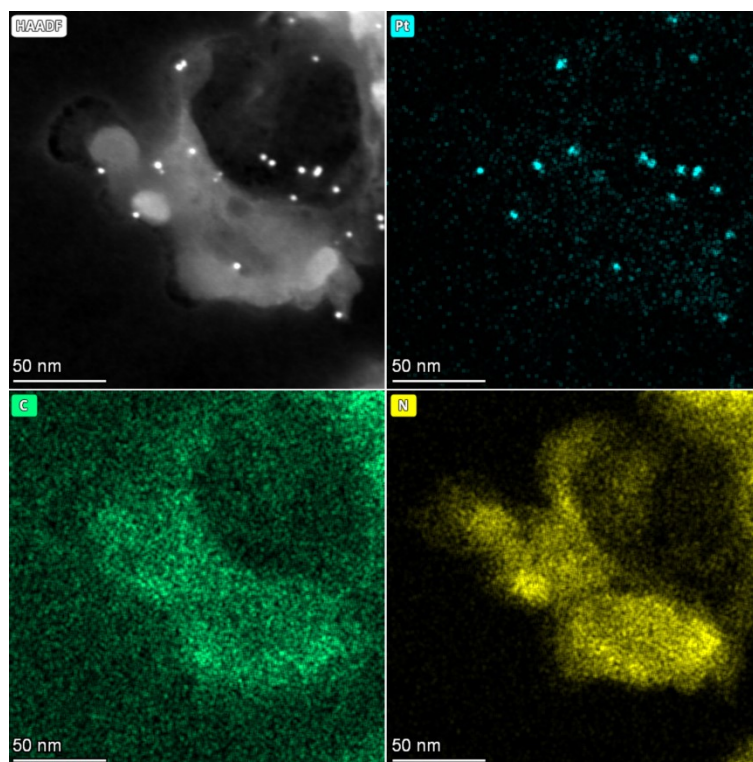

**Fig. S17.** EDS mapping images of Pt<sub>1</sub>/Pt<sub>NP</sub>/g-C<sub>3</sub>N<sub>4</sub>.

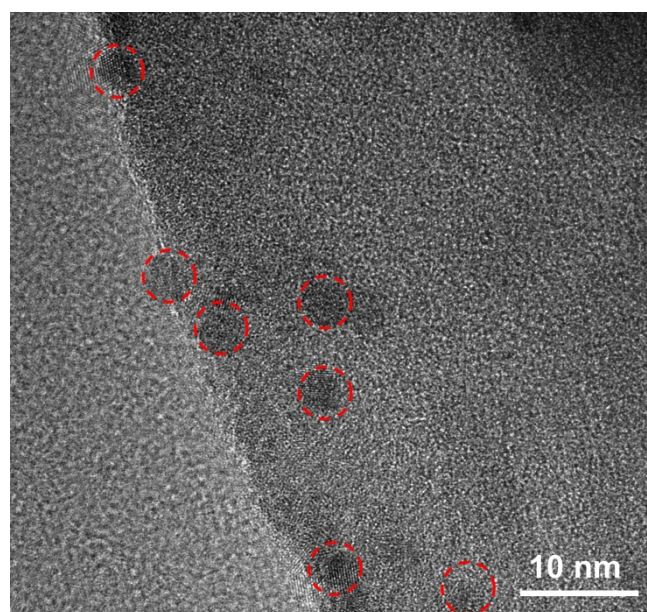

**Fig. S18.** HRTEM image of Pt<sub>1</sub>/Pt<sub>NP</sub>/MIL-125 (red box is Pt<sub>NP</sub>).

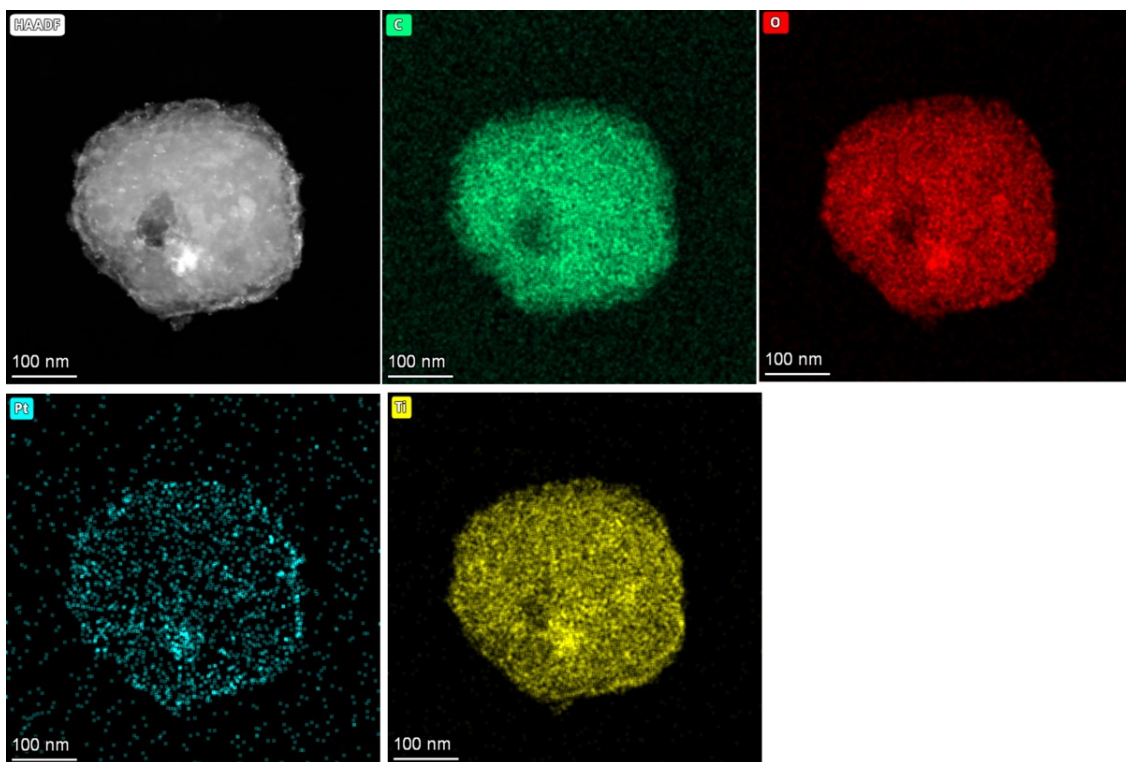

**Fig. S19.** EDS mapping images of Pt<sub>1</sub>/Pt<sub>NP</sub>/MIL-125.

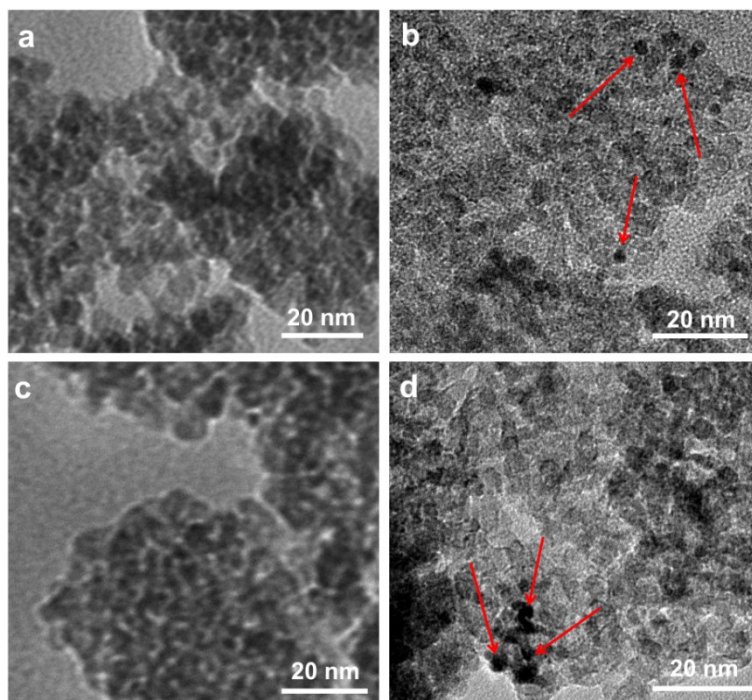

**Fig. S20.** TEM images of (a) TiO<sub>2</sub>, (b) Pt<sub>NP</sub>/TiO<sub>2</sub>, (c) Pt<sub>1</sub>/TiO<sub>2</sub> and (d) Pt<sub>1</sub>/Pt<sub>NP</sub>/TiO<sub>2</sub>.

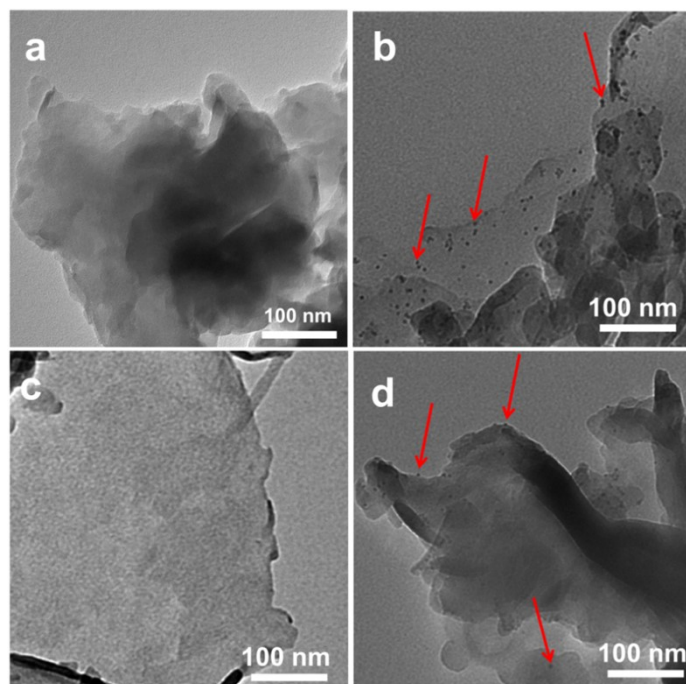

**Fig. S21.** TEM image of (a)  $g\text{-C}_3\text{N}_4$ , (b)  $\text{Pt}_{\text{NP}}/g\text{-C}_3\text{N}_4$ , (c)  $\text{Pt}_1/g\text{-C}_3\text{N}_4$  and (d)  $\text{Pt}_1/\text{Pt}_{\text{NP}}/g\text{-C}_3\text{N}_4$ .

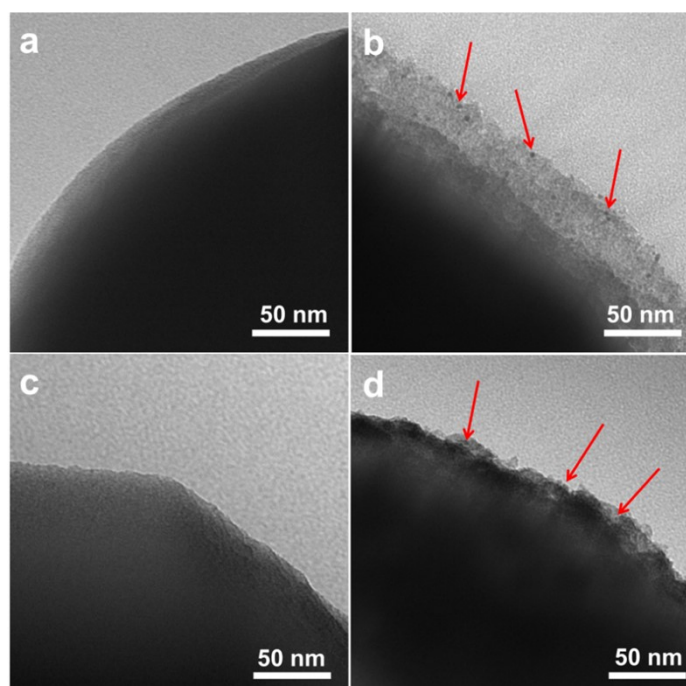

**Fig. S22.** TEM image of (a) MIL-125, (b)  $\text{Pt}_{\text{NP}}/\text{MIL-125}$ , (c)  $\text{Pt}_1/\text{MIL-125}$  and (d)  $\text{Pt}_1/\text{Pt}_{\text{NP}}/\text{MIL-125}$ .

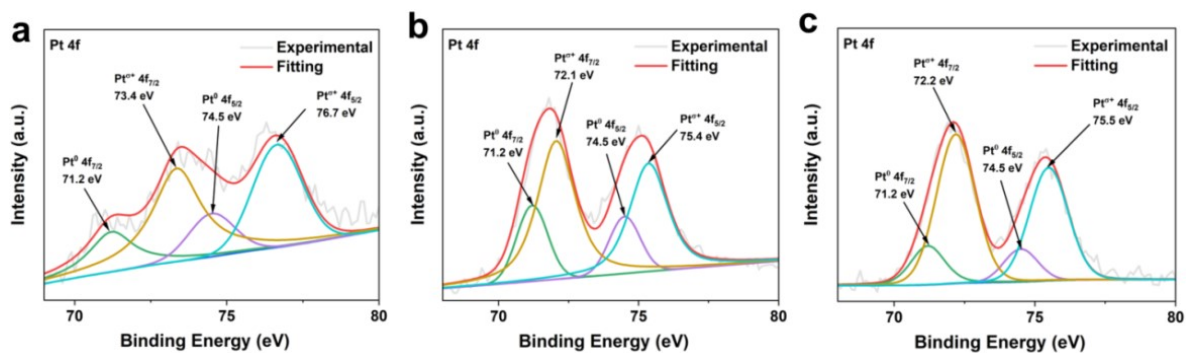

**Fig. S23.** The XPS spectra of Pt species in (a)  $\text{Pt}_1/\text{Pt}_{\text{NP}}/\text{TiO}_2$ , (b)  $\text{Pt}_1/\text{Pt}_{\text{NP}}/\text{MIL-125}$ , (c)  $\text{Pt}_1/\text{Pt}_{\text{NP}}/\text{g-C}_3\text{N}_4$ .

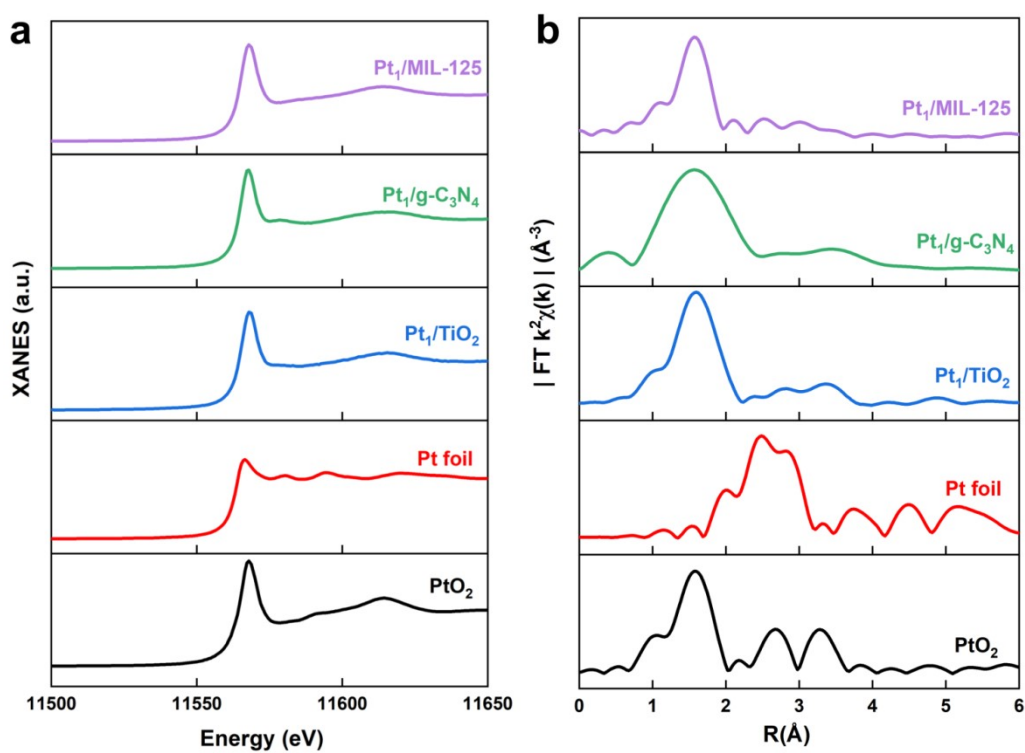

**Fig. S24.** (a) Pt  $L_3$ -edge XANES spectra of  $\text{Pt}_1/\text{MIL-125}$ ,  $\text{Pt}_1/\text{g-C}_3\text{N}_4$ ,  $\text{Pt}_1/\text{TiO}_2$ , Pt foil and  $\text{PtO}_2$ . (b) FT-EXAFS spectra at R space of  $\text{Pt}_1/\text{MIL-125}$ ,  $\text{Pt}_1/\text{g-C}_3\text{N}_4$ ,  $\text{Pt}_1/\text{TiO}_2$ , Pt foil and  $\text{PtO}_2$ . The above results imply the single atom of Pt anchored on these supports.

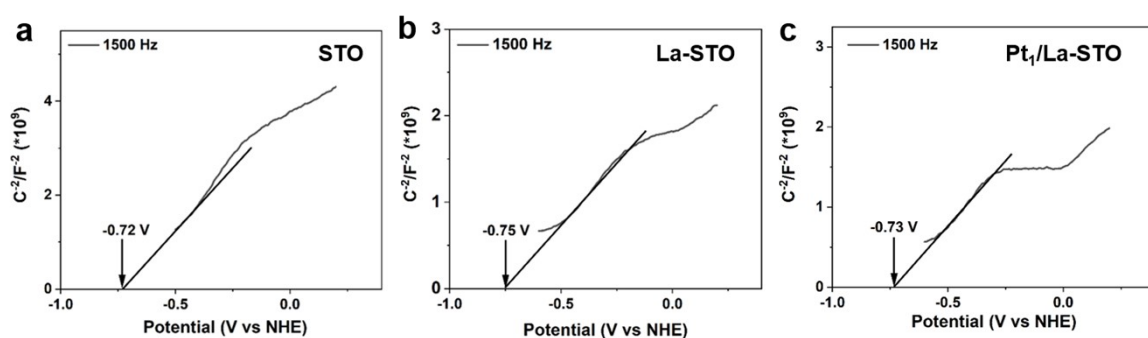

**Fig. S25.** Mott-Schottky (M-S) plots of the (a) STO, (b) La-STO, (c) Pt<sub>1</sub>/La-STO. The flat band potentials have been transferred to the values under pH=0 by using the equations of  $E_{\text{Ag/AgCl}} = E_{\text{RHE}} - 0.059\text{pH} - 0.197$  and  $E_{\text{NHE}} = E_{\text{RHE}} - 0.059\text{pH}$ . The flat band potential obtained by the M-S plots is approximately 0.1 V below their conductor band positions for n-type semiconductor. The  $E_{\text{CBM}}$  are about -0.82, -0.85, -0.83 V vs NHE (pH=0) for STO, La-STO and Pt<sub>1</sub>/La-STO respectively.

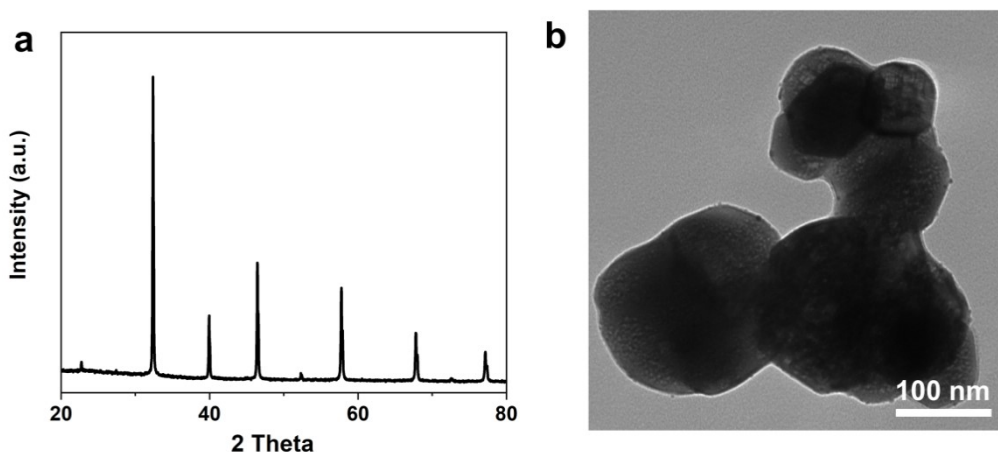

**Fig. S26.** The crystal structure and morphology of the used Pt<sub>1</sub>/Pt<sub>NP</sub>/La-STO. (a) XRD pattern. (b) TEM image.

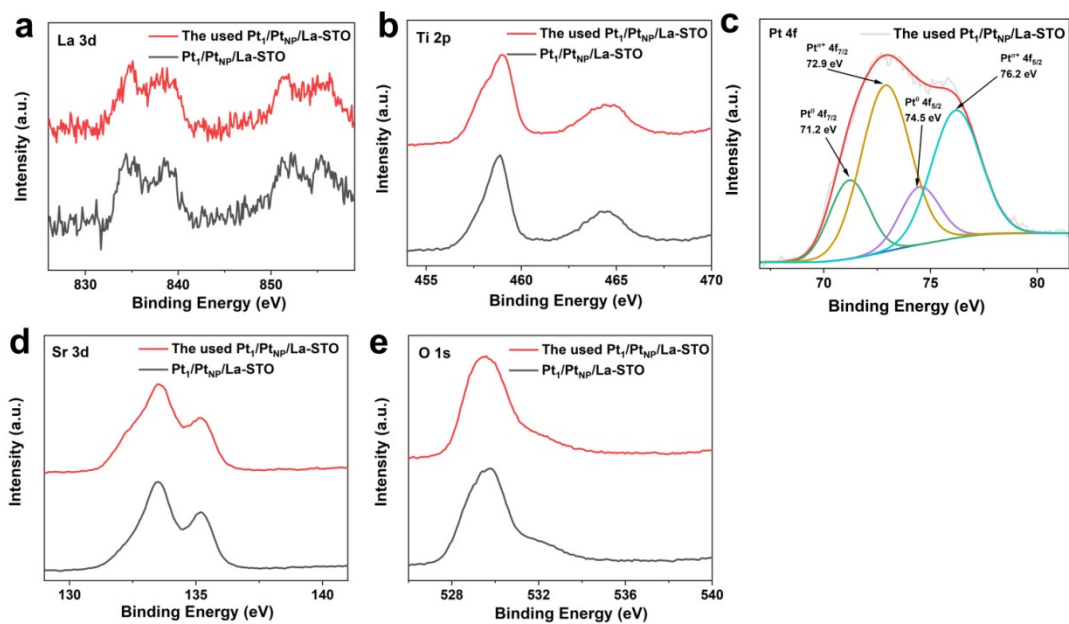

**Fig. S27.** The element chemical states of the used  $\text{Pt}_1/\text{Pt}_{\text{NP}}/\text{La-STO}$ .

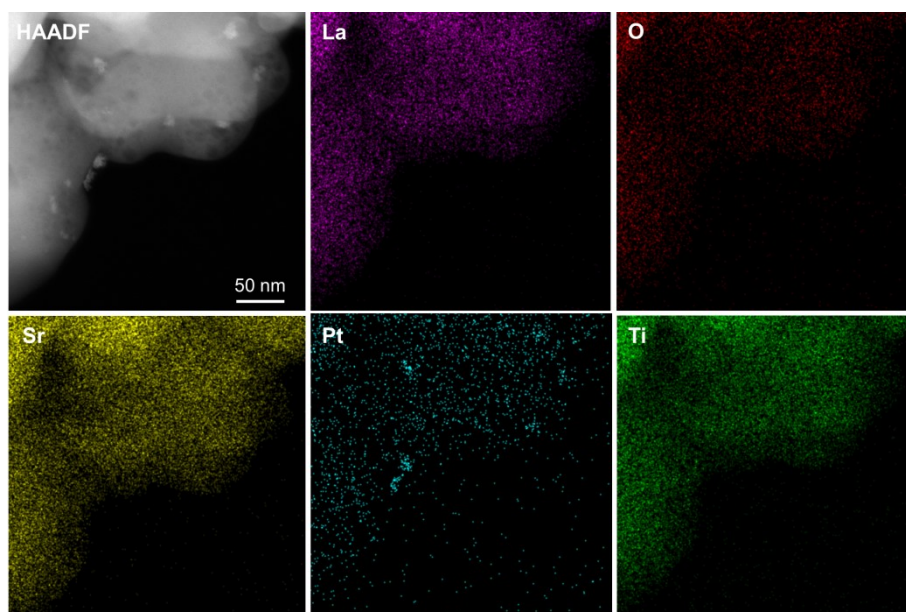

**Fig. S28.** Elemental mapping images of  $\text{Pt}_1/\text{Pt}_{\text{NP}}/\text{La-STO}$  after stability test photocatalytic overall water splitting under light irradiation.

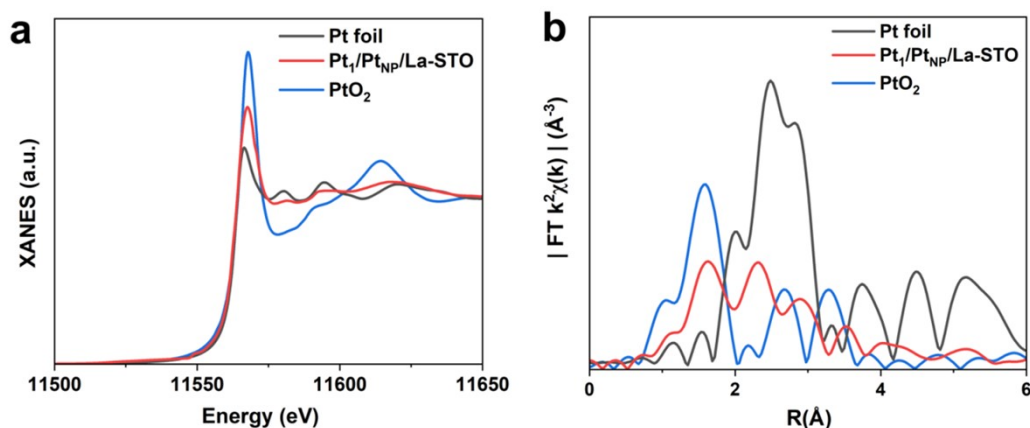

**Fig. S29.** (a) Pt L<sub>3</sub>-edge XANES spectra of the used Pt<sub>1</sub>/Pt<sub>NP</sub>/La-STO, Pt foil and PtO<sub>2</sub>. (b) FT-EXAFS spectra at R space of the used Pt<sub>1</sub>/Pt<sub>NP</sub>/La-STO, Pt foil and PtO<sub>2</sub>.

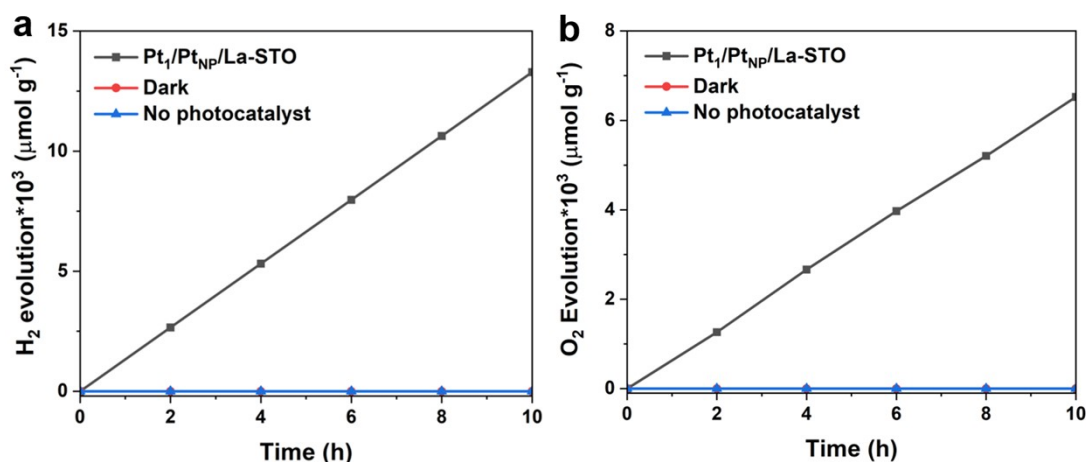

**Fig. S30.** The control experiments of photocatalytic OWS upon Pt<sub>1</sub>/Pt<sub>NP</sub>/La-STO at different condition after 10 hours light irradiation.

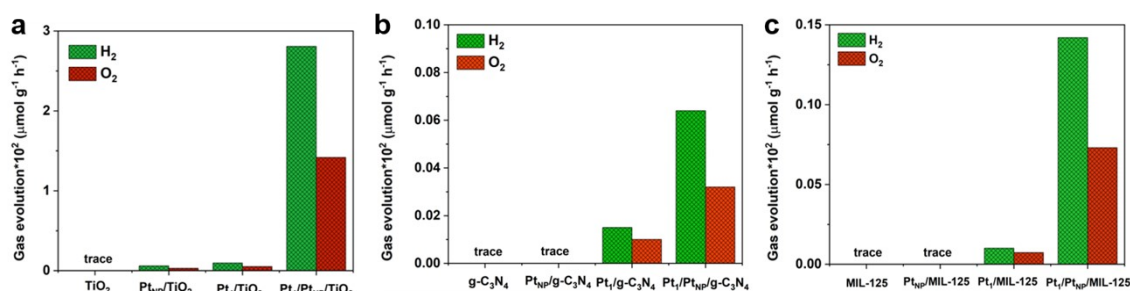

**Fig. S31.** The photocatalytic OWS activities upon Pt<sub>1</sub>/Pt<sub>NP</sub>/TiO<sub>2</sub>, Pt<sub>1</sub>/Pt<sub>NP</sub>/g-C<sub>3</sub>N<sub>4</sub> and Pt<sub>1</sub>/Pt<sub>NP</sub>/MIL-125 their corresponding control samples. Reaction condition: 1.0 mg photocatalysts, 0.2 mL H<sub>2</sub>O and 10 hours light irradiation.

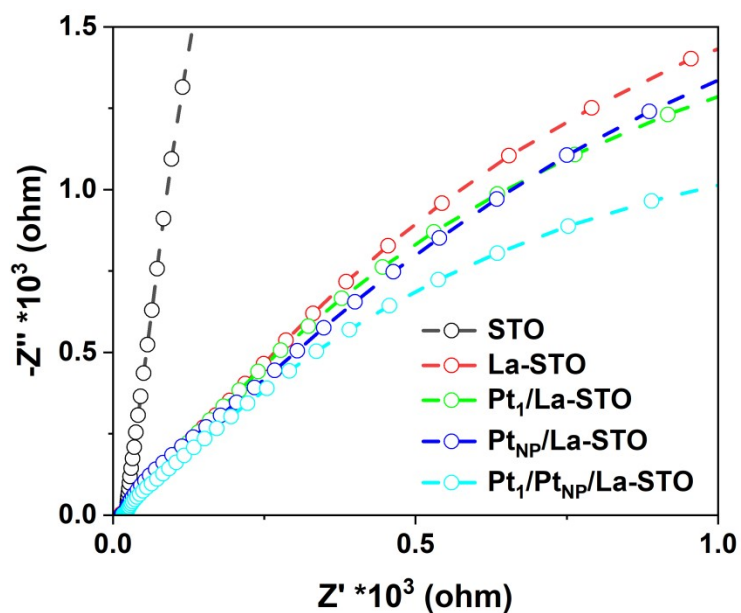

Fig. S32. Electrochemical impedance spectroscopy of samples.

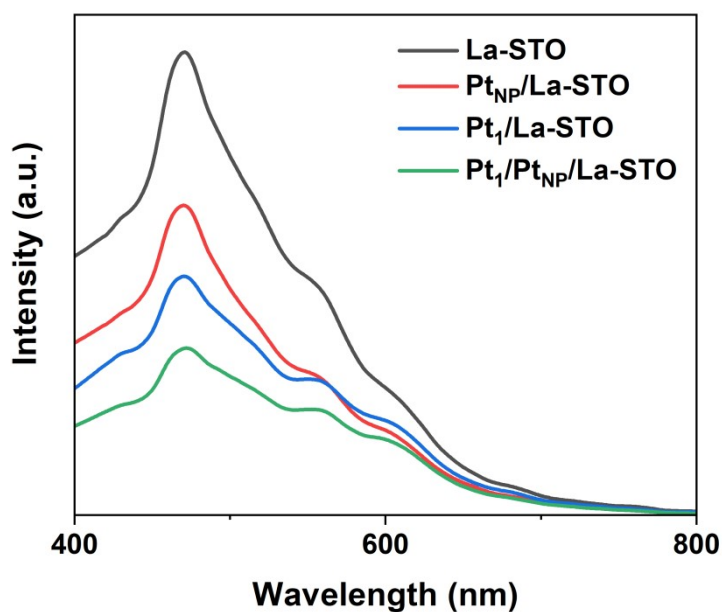

Fig. S33. Photoluminescence (PL) emission spectra of different samples.

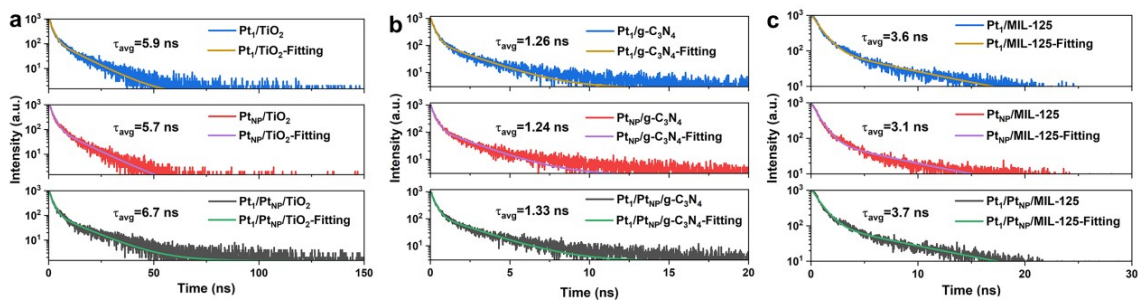

Fig. S34. The lifetime of charge carriers over  $\text{Pt}_1/\text{Pt}_{\text{NP}}/\text{TiO}_2$ ,  $\text{Pt}_1/\text{Pt}_{\text{NP}}/\text{g-C}_3\text{N}_4$ ,  $\text{Pt}_1/\text{Pt}_{\text{NP}}/\text{MIL-125}$  and the corresponding samples.



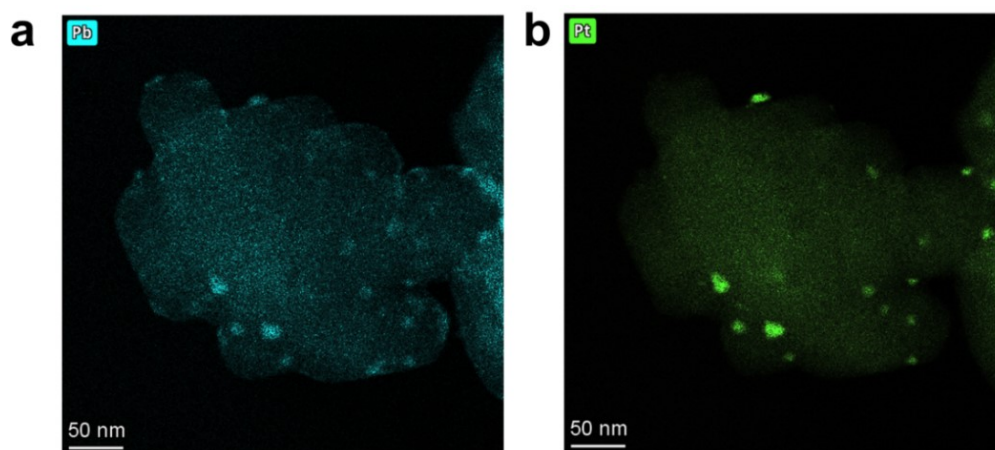

**Fig. S35.** The photo-deposition of  $\text{PbO}_2$  method was used as probe experiment to demonstrate the location of photo-generated holes during light irradiation. The mapping images of (a) Pb and (b) Pt on  $\text{Pt}_1/\text{Pt}_{\text{NP}}/\text{La-STO}$ .

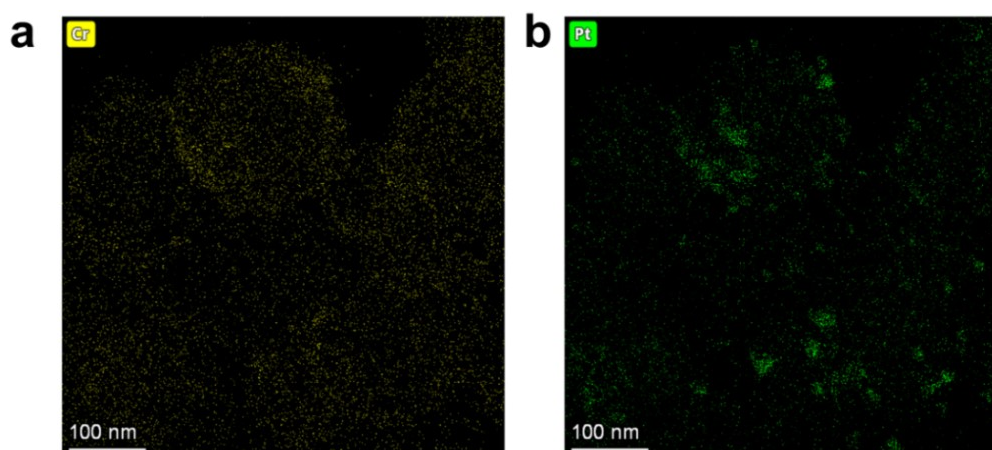

**Fig. S36.** The photo-deposition of  $\text{Cr}_2\text{O}_3$  method was used as probe experiment to demonstrate the location of photo-generated electrons during light irradiation. The mapping images of (a) Cr and (b) Pt on  $\text{Pt}_1/\text{Pt}_{\text{NP}}/\text{La-STO}$ .

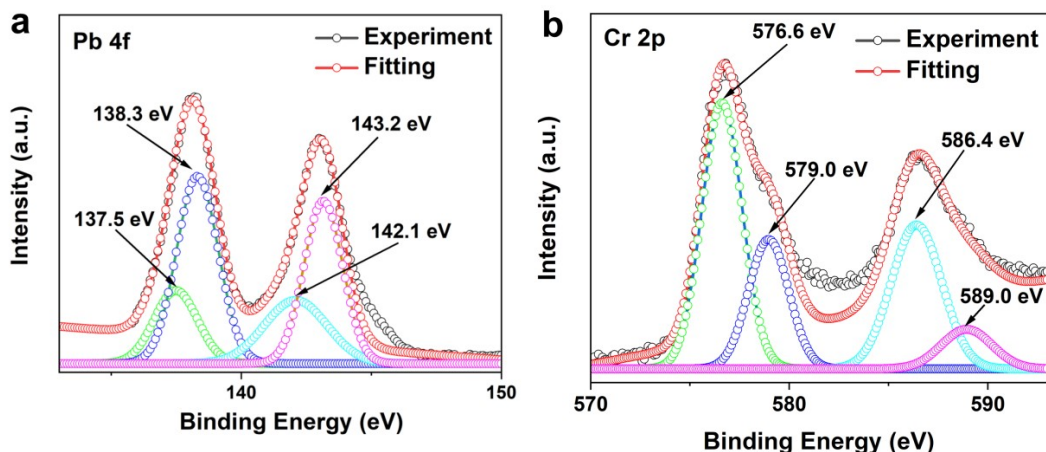

**Fig. S37.** The XPS results of (a) Pb 4f and (b) Cr 2p on the surface of Pt<sub>1</sub>/Pt<sub>NP</sub>/La-STO after photo-deposition of PbO<sub>2</sub> and Cr<sub>2</sub>O<sub>3</sub>. As for the Pb 4f, the binding energies of 138.3 and 143.2 eV can be assigned to Pb 4f<sub>7/2</sub> and Pb 4f<sub>5/2</sub> of PbO<sub>2</sub>, respectively. The Pb<sup>2+</sup> species can be oxidized to Pb<sup>4+</sup> (PbO<sub>2</sub>) by the photo-generated holes. The peaks of 137.5 and 142.1 eV are the Pb 4f<sub>7/2</sub> and Pb 4f<sub>5/2</sub> typical binding energies of Pb<sup>2+</sup>, which represent the possible adsorptive Pb<sup>2+</sup> on the surface of Pt<sub>1</sub>/Pt<sub>NP</sub>/La-STO. As for the Cr 2p, the peaks located at about 576.6 and 586.4 eV are the typical binding energies of Cr<sup>3+</sup> in Cr<sub>2</sub>O<sub>3</sub>. The binding energies of 579.0 and 589.0 eV can be assigned to the typical peaks of Cr<sup>6+</sup> in K<sub>2</sub>CrO<sub>4</sub>, which due to the possible adsorptive CrO<sub>4</sub><sup>2-</sup> on Pt<sub>1</sub>/Pt<sub>NP</sub>/La-STO surface after the photo-deposition reaction.

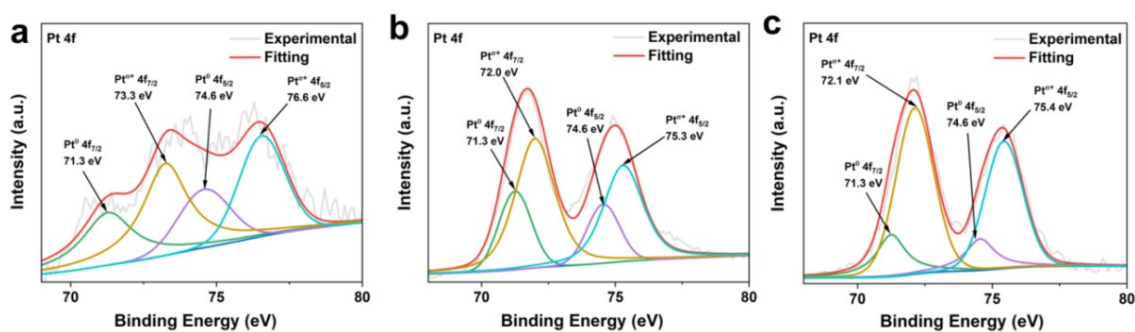

**Fig. S38.** The *quasi-in-situ* XPS measurements of (a) Pt<sub>1</sub>/Pt<sub>NP</sub>/TiO<sub>2</sub>, (b) Pt<sub>1</sub>/Pt<sub>NP</sub>/MIL-125, (c) Pt<sub>1</sub>/Pt<sub>NP</sub>/g-C<sub>3</sub>N<sub>4</sub> after light irradiation.

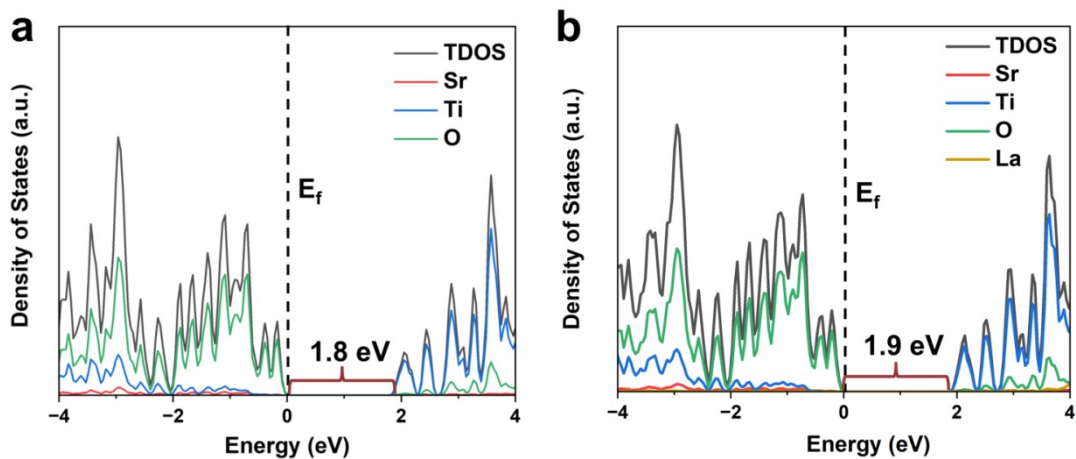

**Fig. S39.** Calculated TDOS and PDOS upon STO and La-STO.

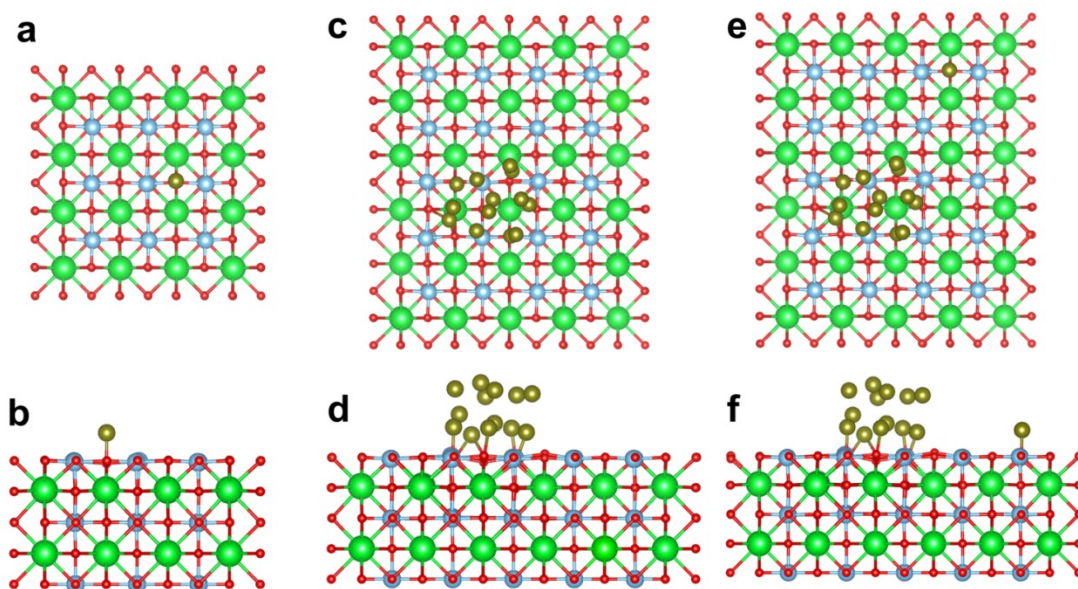

**Fig. S40.** The optimized structural models of  $\text{Pt}_1/\text{La-STO}$  (a): top view, (b): side view;  $\text{Pt}_{\text{NP}}/\text{La-STO}$  (c): top view, (d): side view;  $\text{Pt}_1/\text{Pt}_{\text{NP}}/\text{La-STO}$  (e): top view, (f): side view. The green, blue, red and brown balls are represented as Sr, Ti, O and Pt atoms, respectively.

**Table S1.** Structural parameters extracted from the Pt L<sub>3</sub>-edge EXAFS fitting. ( $S_0^2=0.81$ ).

| Sample                                    | Scattering pair | CN   | R(Å) | $\sigma^2(10^{-3}\text{Å}^2)$ | $\Delta E_0(\text{eV})$ | R factor |
|-------------------------------------------|-----------------|------|------|-------------------------------|-------------------------|----------|
| Pt foil                                   | Pt-Pt           | 12*  | 2.76 | 4.4                           | 6.8                     | 0.002    |
| Pt <sub>1</sub> /La-STO                   | Pt-O            | 1.66 | 1.98 | 2.8                           | 2.3                     | 0.008    |
| Pt <sub>1</sub> /Pt <sub>NP</sub> /La-STO | Pt-O            | 1.37 | 2.02 | 2.4                           | 10.4                    | 0.010    |
|                                           | Pt-Pt           | 5.80 | 2.75 | 3.9                           | 4.5                     |          |

$S_0^2$  is the amplitude reduction factor; CN is the coordination number; R is interatomic distance (the bond length between central atoms and surrounding coordination atoms);  $\sigma^2$  is Debye-Waller factor (a measure of thermal and static disorder in absorber-scatterer distances);  $\Delta E_0$  is edge-energy shift (the difference between the zero kinetic energy value of the sample and that of the theoretical model). R factor is used to value the goodness of the fitting.

\* This value was fixed during EXAFS fitting, based on the known structure.

Error bounds that characterize the structural parameters obtained by EXAFS spectroscopy were estimated as  $N \pm 20\%$ ;  $R \pm 1\%$ ;  $\sigma^2 \pm 25\%$ ;  $\Delta E_0 \pm 10\%$ .

Pt<sub>1</sub>/Pt<sub>NP</sub>/La-STO (FT range: 2.0-12.0 Å<sup>-1</sup>; fitting range: 1.3-3.3 Å).

Pt<sub>1</sub>/La-STO (FT range: 2.0-8.0 Å<sup>-1</sup>; fitting range: 1.0-3.0 Å).

Pt foil (FT range: 3.0-12.0 Å<sup>-1</sup>; fitting range: 1-3 Å).

**Table S2.** Comparison the catalytic activity of Pt<sub>1</sub>/Pt<sub>NP</sub>/La-STO to recent reported photocatalysts for OWS without sacrificial agents or photosensitizer. Reaction substrate: H<sub>2</sub>O. The unit of OWS performance has been unified into  $\mu\text{mol g}^{-1} \text{h}^{-1}$ .

|    | Samples                                                                       | Cocatalysts                                           | H <sub>2</sub> ( $\mu\text{mol g}^{-1} \text{h}^{-1}$ ) | O <sub>2</sub> ( $\mu\text{mol g}^{-1} \text{h}^{-1}$ ) | Stability                                 | Reference                                   |
|----|-------------------------------------------------------------------------------|-------------------------------------------------------|---------------------------------------------------------|---------------------------------------------------------|-------------------------------------------|---------------------------------------------|
|    | <b>Pt<sub>1</sub>/Pt<sub>NP</sub>/La-STO</b>                                  | <b>Pt<sub>1</sub>, Pt<sub>NP</sub></b>                | <b>1329.0</b>                                           | <b>652.1</b>                                            | <b>10 cycles, <math>\geq 100</math> h</b> | <b>This work</b>                            |
| 1  | Pt@NH <sub>2</sub> -UiO-66@MnO <sub>x</sub>                                   | Pt, MnO <sub>x</sub>                                  | 19.6                                                    | 10.1                                                    | 6 cycles, 18 h                            | Adv. Mater. 2020, 32, 2004747               |
| 2  | BiVO <sub>4</sub> -FTO                                                        | Rh, Cr <sub>2</sub> O <sub>3</sub> , MnO <sub>x</sub> | 65.7                                                    | 32.6                                                    | 3 cycle, 12 h                             | Adv. Sci. 2022, 9, 2105299                  |
| 3  | Pt@TpBpy-NS                                                                   | Pt                                                    | 132                                                     | 64                                                      | 5 cycles, 25 h                            | Nat. Commun. 2023, 14, 593                  |
| 4  | SrTaO <sub>2</sub> N                                                          | CrO <sub>y</sub> , Ru, IrO <sub>2</sub> (MW)          | 60.67                                                   | 20                                                      | 6 cycles, 18 h                            | J. Am. Chem. Soc. 2023, 145, 3839–3843      |
| 5  | PCN/LaOCl-2                                                                   | Pt, CoO <sub>x</sub>                                  | 446                                                     | 214                                                     | 5 cycles, 25 h                            | Angew. Chem. Int. Ed. 2020, 59, 20919–20923 |
| 6  | Zr-TaON/Ta <sub>3</sub> N <sub>5</sub> (3 h)                                  | Ru, Cr <sub>2</sub> O <sub>3</sub> , IrO <sub>2</sub> | $\approx 97.2$                                          | $\approx 44.4$                                          | 2 cycles, 24 h                            | Angew. Chem. Int. Ed. 2022, 61, e202116573  |
| 7  | TJU-16-Rh <sub>0.22</sub>                                                     | Rh                                                    | 31                                                      | 15                                                      | 5 cycles, 15 h                            | Nat. Catal. 2020, 3, 1027–1033              |
| 8  | Pt@ZnTiO <sub>3-x</sub> N <sub>y</sub> @RhO <sub>x</sub>                      | Pt, RhO <sub>x</sub>                                  | $\approx 170$                                           | $\approx 78$                                            | 3 cycles, 6 h                             | Small 2021, 17, 2100084                     |
| 9  | I-TST                                                                         | Pt, Co(OH) <sub>2</sub>                               | $\approx 125$                                           | $\approx 18$                                            | 1 cycles, 10 h                            | J. Am. Chem. Soc. 2020, 142, 4508–4516      |
| 10 | g-C <sub>3</sub> N <sub>4</sub> /rGO/PDIP                                     | Pt, Co(OH) <sub>2</sub>                               | 632                                                     | 312                                                     | 21 cycles, 126 h                          | Adv. Mater. 2021, 33, 2007479               |
| 11 | CNN/BDCNN                                                                     | Pt, Co(OH) <sub>2</sub>                               | 626.9                                                   | 311.2                                                   | 4 cycles, 24 h                            | Nat. Energy 2021, 6, 388–397                |
| 12 | KTaO <sub>3</sub> /Ta <sub>3</sub> N <sub>5</sub>                             | Rh/Cr <sub>2</sub> O <sub>3</sub>                     | 36.67                                                   | 18.33                                                   | 3 cycles, 15 h                            | Nat. Catal. 2018, 1, 756–763                |
| 13 | IEF-11                                                                        | Pt                                                    | 29.91                                                   | 13.73                                                   | 10 cycles, 240 h                          | Adv. Mater. 2021, 33, 2106627               |
| 14 | CTF-HUST-A1-'BuOK                                                             | NiP <sub>x</sub> , Pt                                 | 25.4                                                    | 12.9                                                    | 5 cycles, 25 h                            | Angew. Chem. Int. Ed. 2020, 59, 6007–6014   |
| 15 | r-CTF NSs                                                                     | Pt                                                    | 102.6                                                   | 50.6                                                    | 5 cycles, 25 h                            | Angew. Chem. Int. Ed. 2021, 60, 25381–25390 |
| 16 | PbTiO <sub>3</sub> /Rh/Cr <sub>2</sub> O <sub>3</sub>                         | Rh, Cr <sub>2</sub> O <sub>3</sub>                    | 32.9                                                    | 17.4                                                    | 1 cycles, 5 h                             | J. Am. Chem. Soc. 2022, 144, 20342–20350    |
| 17 | Y <sub>2</sub> Ti <sub>2</sub> O <sub>5</sub> S <sub>2</sub>                  | Rh, Cr <sub>2</sub> O <sub>3</sub> , IrO <sub>2</sub> | $\approx 31.25$                                         | $\approx 15.0$                                          | 2 cycles, 20 h                            | Nat. Mater. 2019 18, 827–832                |
| 18 | PA-Ni <sub>1.1</sub> @PCN/Pt <sub>5h</sub> NIR                                | Pt                                                    | 0.058                                                   | 0.027                                                   | 5 cycles, 120 h                           | Angew. Chem. Int. Ed. 2022, 61, e202212234  |
| 19 | IrO <sub>2</sub> /Bi <sub>2</sub> CrO <sub>6</sub> :Ru/SrTiO <sub>3</sub> :Rh | IrO <sub>2</sub> , Pt                                 | $\approx 5.67$                                          | $\approx 4.38$                                          | 3 cycles, 24 h                            | Adv. Mater. 2023, 35, 2211182               |
| 20 | 5Al <sub>2</sub> O <sub>3</sub> /Rh/GaN–ZnO                                   | Al <sub>2</sub> O <sub>3</sub> , Rh                   | $\approx 906$                                           | $\approx 480$                                           | 6 cycles, 9 h                             | Nat. Catal. 2023, 6, 80–88                  |
